# Supplementary material for: Optimal Code Generation for Machines with Different Types of Instructions.
Source: MDPI journal article supplement (doi:10.3390/biom12040583), 1977-01-01
Supplement: s1 [file s1]

## Exacerbation of elastase-induced emphysema via increased oxidative stress in metallothionein-knockout mice

Ken-ichiro Tanaka<sup>1,\*</sup>, Sachie Shiota<sup>1</sup>, Okina Sakakibara<sup>1</sup>, Mikako Shimoda<sup>1</sup>, Ayaka Takafuji<sup>1</sup>, Misaki Takabatake<sup>1</sup>, Yoshito Kadota<sup>2</sup>, Takashige Kawakami<sup>2</sup>, Shinya Suzuki<sup>2</sup> and Masahiro Kawahara<sup>1</sup>

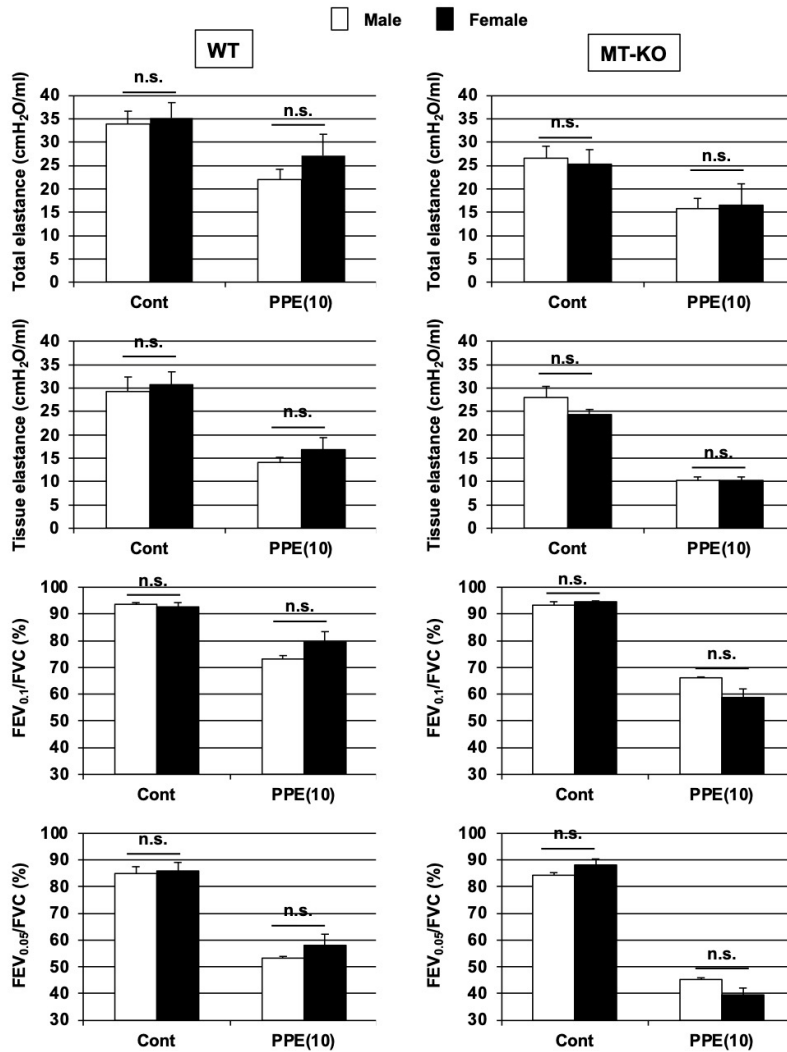

**Supplementary Figure S1.**

### Effect of metallothionein on PPE-induced pulmonary damage.

Wildtype (WT) and MT-1 and -2 gene knockout (MT-KO) mice were treated with sterile saline (Cont) or PPE (10 U/kg) only once, on day 0. Total elastance, tissue elastance, FEV<sub>0.05</sub>/FVC, and FEV<sub>0.1</sub>/FVC values were determined on day 14 as described in the Materials and Methods. Values are the mean  $\pm$  S.E.M. n.s.: not significant (Male vs Female). The experiments that produced the data shown in this figure were performed at least twice.

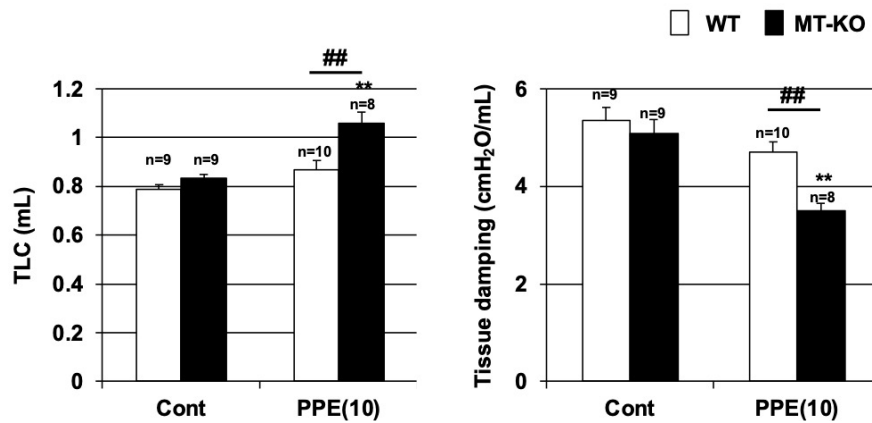

**Supplementary Figure S2.**

**Effect of metallothionein on PPE-induced respiratory dysfunction.**

Wildtype (WT) and MT-1 and -2 gene knockout (MT-KO) mice were treated with sterile saline (Cont) or PPE (10 U/kg) only once, on day 0. TLC, and tissue damping values were determined on day 14 as described in the Materials and Methods (C). Values are the mean  $\pm$  S.E.M. \*\* or ###  $p < 0.01$  (\*\*, vs Control; ###, vs WT). The experiments that produced the data shown in this figure were performed at least twice.

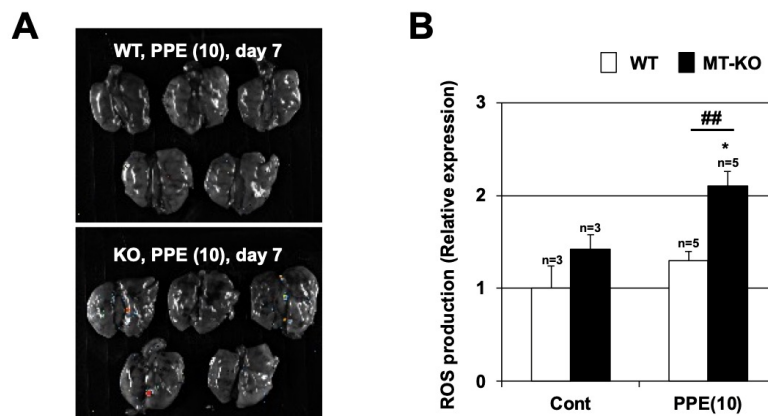

**Supplementary Figure S3.**

**Effect of metallothionein on ROS production after 7 days of PPE administration.**

(A, B) Wildtype (WT) and MT-1 and -2 gene knockout (MT-KO) mice were treated with sterile saline (Cont) or PPE (10 U/kg) only once, on day 0. Luminescent probe (L-012, 75 mg/kg) was administered 7 days after the PPE administration. Isolated lungs were imaged using a FUSION chemiluminescence imaging system (A). The summed pixel intensity of the ROS signal was determined using standard software for FUSION. The data for Cont is the same as in Figure 6 (B). Values are the mean  $\pm$  S.E.M. \* $p < 0.05$ ; ### $p < 0.01$  (\*, vs Control; ###, vs WT). The experiments that produced the data shown in this figure were performed at least twice.
